# Supplementary material
Source: PubMed Central journal article supplement (PMC7375197)
Supplement: NIHMS1597370-supplement-1.pdf [file NIHMS1597370-supplement-1.pdf]

# Figure S1

**A**

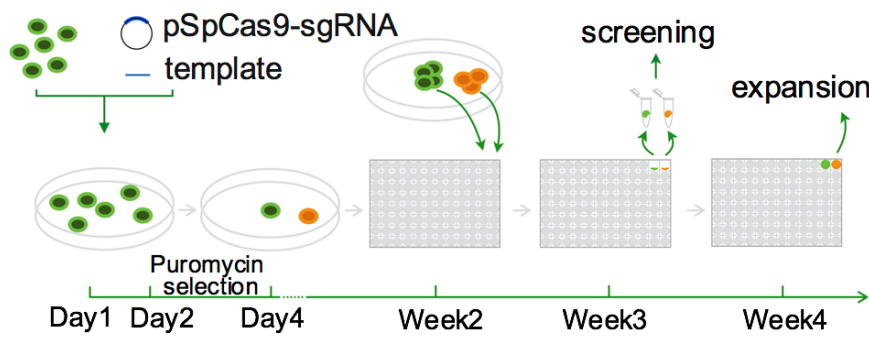

**C**

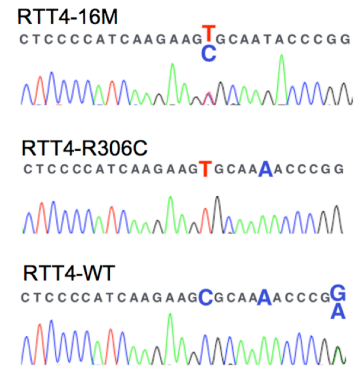

**B**

Target: 5'-CTCCCCATCAAGAAGCGCAAGACC<sup>Small</sup>CGGGAG-3'  
 Template: 5'-...CTCCCCATCAAGAAGT<sup>C916T</sup>GCAA<sup>A</sup>ACCCGAGAG...-3' (102 bp)

|                            | sgRNA targeting |            | HDR           |            |
|----------------------------|-----------------|------------|---------------|------------|
|                            | Colony number   | Efficiency | Colony number | Efficiency |
| Total targeting            | 28/70           | 40.0%      |               |            |
| Number of Alleles Targeted | 1               | 14/70      |               |            |
|                            | 2               | 14/70      |               |            |
| HDR                        |                 |            | 2/70          | 2.9%       |

**D**

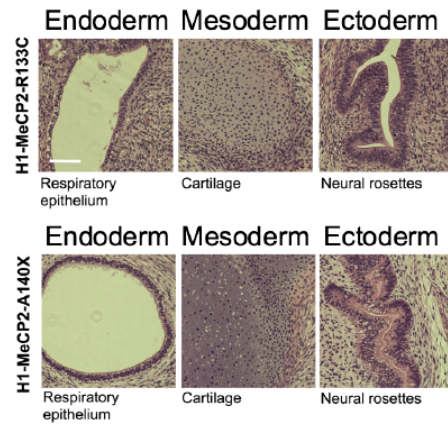

**E**

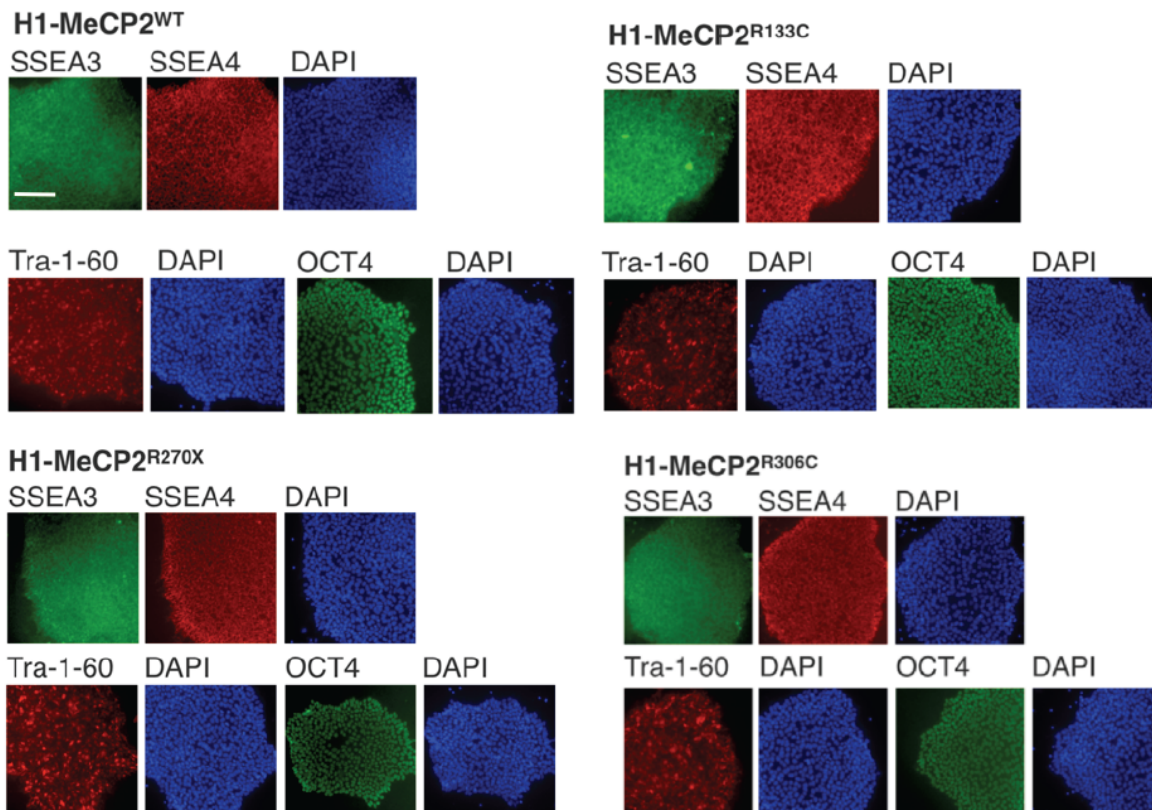

**Figure S1. Related with Figure 1. CRISPR/Cas9-mediated MeCP2 Editing and Characterization of Edited hESCs**

(A) Schematic view of protocol for CRISPR/Cas9-mediated genome editing in hPSCs. Details are described in methods.

(B) Design of CRISPR/Cas9-mediated MECP2 editing in hiPSC line RTT4-16M. Red color indicates desired mutations introduced, blue color indicates synonymous changes, and green color indicates PAM sequence.

(C) Sequences of targeted locus in edited RTT4-16M clones.

(D) In vivo formation of three germ layers of randomly selected MeCP2 mutant hESCs. The scale bar represents 50  $\mu\text{m}$ .

(E) Expressions of pluripotent markers in MeCP2-WT and MeCP2-mutant hESCs. The scale bar represents 50  $\mu\text{m}$ .

# Figure S2

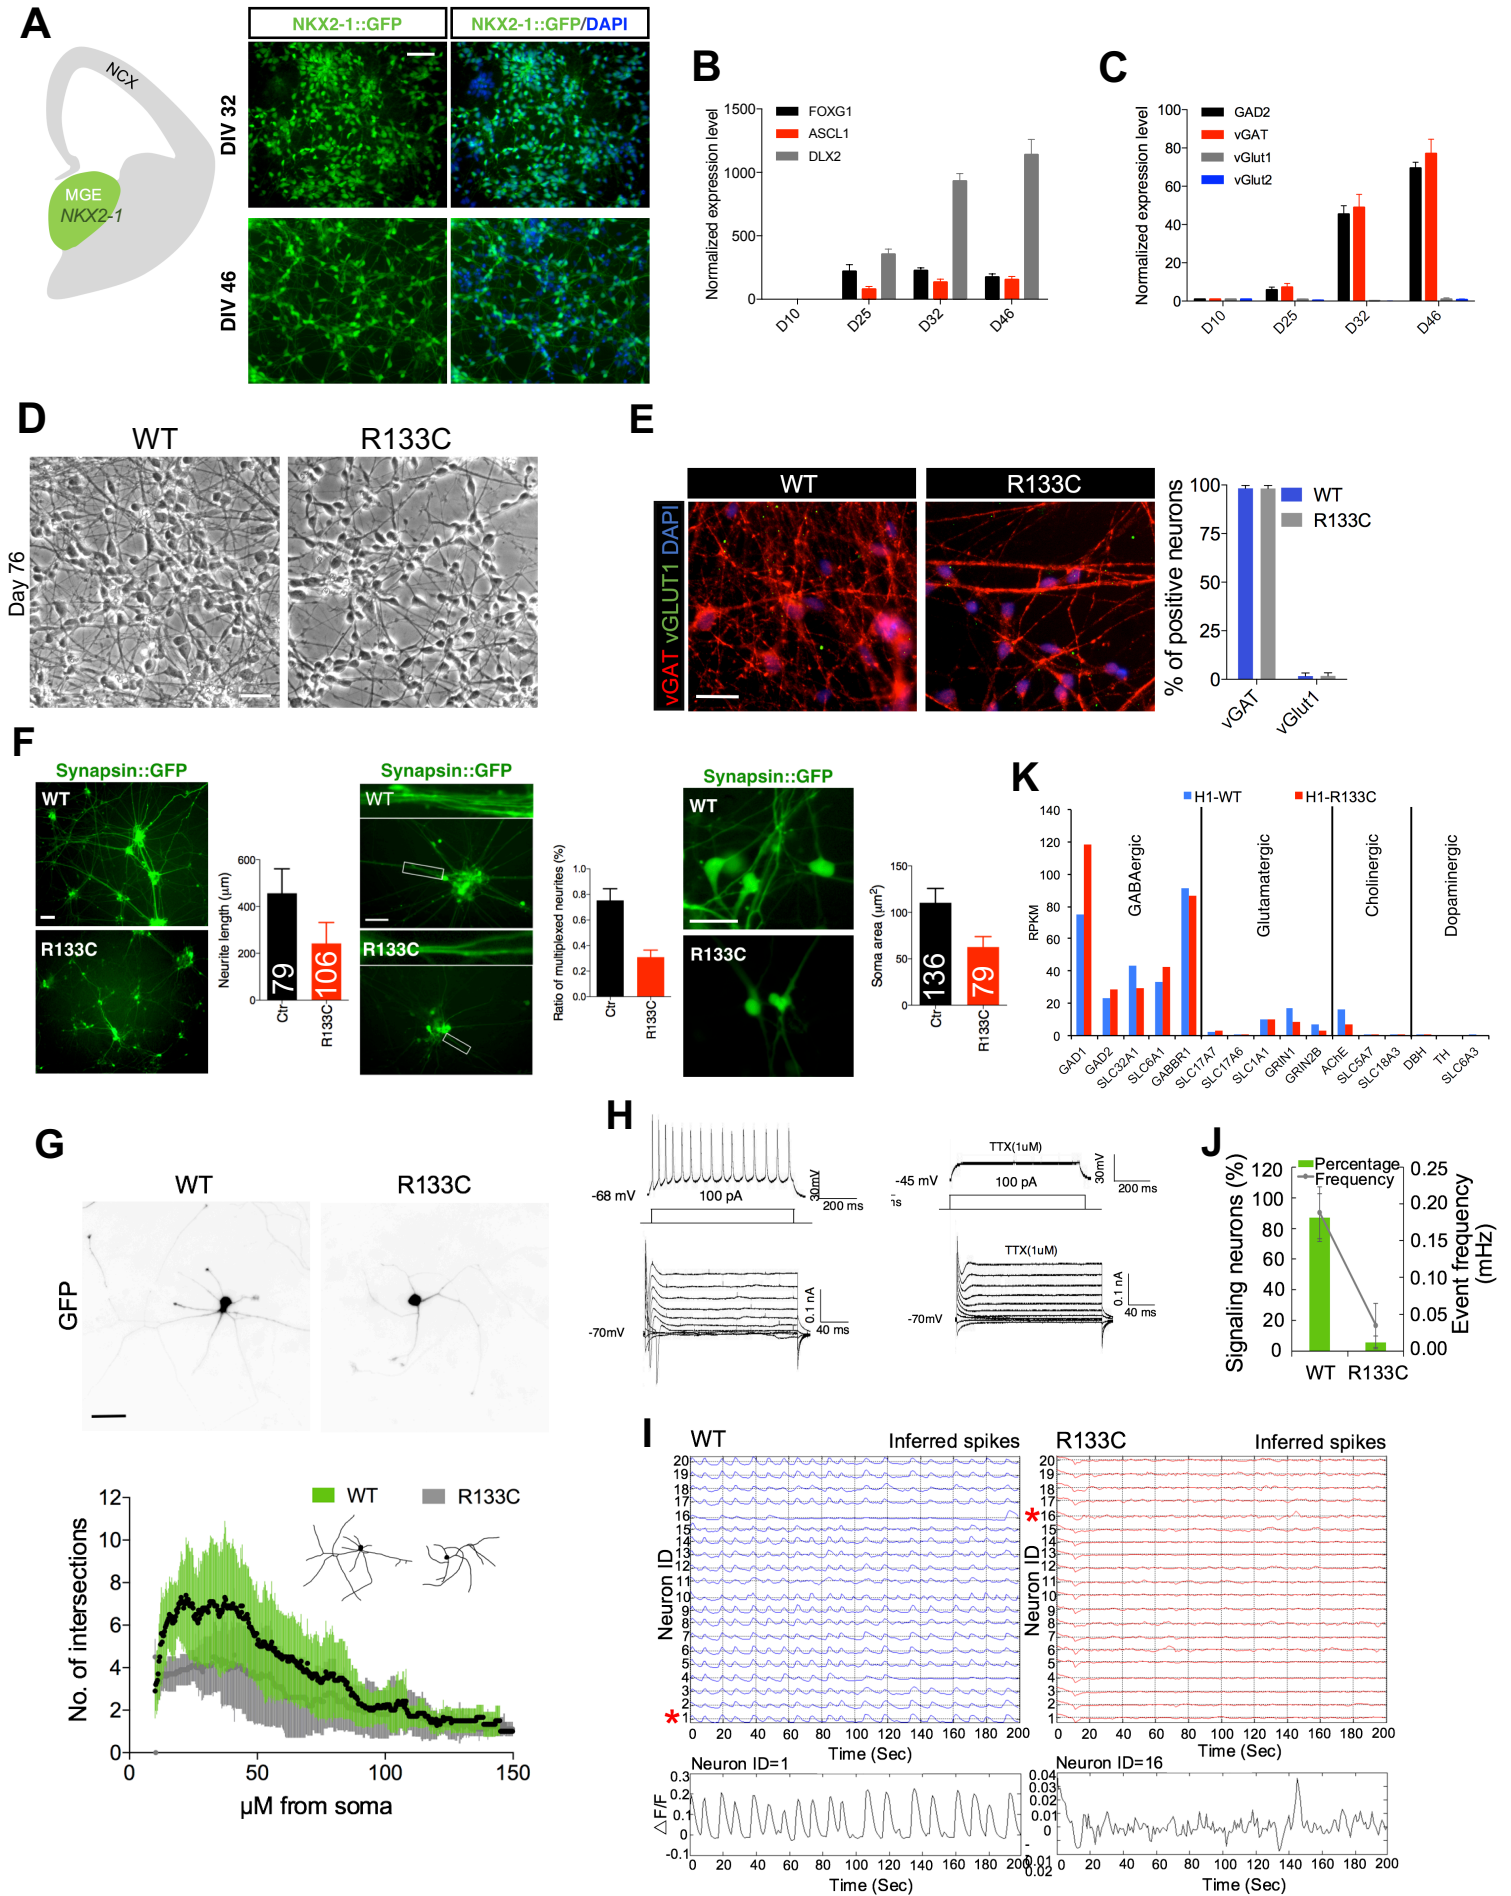

**Figure S2. Related with Figure 1. Characterization of Directly Differentiated Human INs**

(A) The major region for IN production (left) and the generation of high-purity NKX2-1<sup>+</sup> MGE progenitors using the IN differentiation protocol (right). Note NKX2-1<sup>+</sup> MGE is the ventral part of forebrain where INs are produced, and with the applied differentiation protocol,

homogeneous NKX2-1-GFP<sup>+</sup> progenitors were produced. The scale bar represents 50  $\mu\text{m}$ .

(B and C) Expressions of markers for IN development as detected by qPCR. Mean  $\pm$  SD is shown (n=3 technical repeats of the same batch of RNA pellets).

(D) Phase-contrast micrographs of MeCP2-WT and MeCP2-R133C INs at day 76. The scale bar represents 20  $\mu\text{m}$ .

(E) Immunostaining and quantification of vGAT and vGLUT1 in MeCP2-WT and MeCP2-R133C INs. Mean  $\pm$  SD is shown for each condition (n=3 biologically independent samples).

(F) MeCP2-R133C INs showed decreased neurite length (left) (n=79 and 106 neurites of neurons from 3 independently treated wells for MeCP2-WT and MeCP2-R133C INs, respectively), neurite interaction (middle) (n=5 independently treated wells), and soma size (right) (n=136 and 79 cells from 5 independently treated wells for MeCP2-WT and MeCP2-R133C INs, respectively). Mean  $\pm$  SD is shown. Neurite and cell numbers used for quantification are labeled. INs were transduced with AAV1.hSyn.eGFP vectors at 9 weeks of maturation (day 81) and the above assays were performed at 12 weeks of maturation (day 102). Images from live IN cultures were acquired and used for quantification. The scale bar represents 25  $\mu\text{m}$ .

(G) Representative images of MeCP2-WT and MeCP2-R133C IN morphologies and Sholl analysis of dendrite complexity. INs were transduced with AAV1.hSyn.eGFP vectors at day 67 and sparsely re-plated on to mouse astrocytes on day 77. Samples were fixed and stained with anti-GFP antibody after additional 4 days' culturing. Images were randomly acquired and individually positioned MeCP2-WT (n=10 neurons from 2 independent wells) or MeCP2-R133C (n=10 neurons from 2 independent wells) INs without dendritic intersection with neighboring neurons were used for quantification. The scale bar represents 20  $\mu\text{m}$ .

(H) Representative images of action potential, sodium and potassium currents in MeCP2-WT INs before and after TTX treatment at 8 weeks of maturation (day 74).

(I) Calcium spikes of MeCP2-WT and MeCP2-R133C INs. INs were transduced with AAV1.syn.GCaMP6s.WPRE.SV40 vectors at 7 weeks of maturation (day 67) and calcium imaging was performed at 11 weeks of maturation (day 98). Spiking pattern of representative INs labeled by red stars are enlarged on the bottom.

(J) Quantification of percentage of signaling neurons (n=4 independently treated wells) and frequency of calcium surges (n=47 signaling MeCP2-WT neurons from 4 independently treated wells, and n=4 signaling MeCP2-R133C neurons from 4 independently treated wells). Mean  $\pm$  SD is shown.

(K) Expressions of markers for various neuronal types in day 74 MeCP2-WT and MeCP2-R133C INs detected by RNA-seq.



**Figure S3. Related with Figure 1. Transcriptome and Proteome Analysis of Human INs**

(A) GOs of genes down-regulated during MeCP2-WT IN development. Genes related to DNA replication and cell cycle transition were down-regulated in mature INs (day 74).

(B) GSEA of gene signatures for *in vivo* human brain development. Enrichment and depletion of the gene signature ( $-\log_{10}(\text{FDR})$ ) in INs at each time point are shown by red and blue color, respectively.

(C) Disease analysis based on differential expressions of biomarkers between MeCP2-WT and MeCP2-R133C samples.

(D) Heat map of proteomic profiling in day 76 MeCP2-WT and MeCP2-R133C INs. 3 biologically independent samples for both MeCP2-WT and MeCP2-R133C INs were profiled.

(E) Comparative analysis of RNA (day 74) and protein (day 76) levels in mature MeCP2-WT and MeCP2-R133C INs. Z score for  $\log_2$ -transformed RPKM and intensity are plotted in X and Y axis, respectively. Pearson correlation coefficient and its p-value are shown.

(F) Heat map of protein levels of calcium-related cellular components in day 76 MeCP2-WT and MeCP2-R133C INs. 3 biologically independent samples for both MeCP2-WT and MeCP2-R133C INs are shown.

(G) Dendrite complexity of INs before and after KCl depolarization and the corresponding Sholl analysis. INs were transduced with AAV1.hSyn.eGFP vectors at day 67 and sparsely re-plated on to mouse astrocytes on day 77. 2 days after plating, KCl buffer (final concentration: 25 mM) was supplemented to the media, and samples were fixed and stained with anti-GFP antibody after additional 2 days' culturing. Images were randomly acquired and individually positioned MeCP2-WT (n=12 neurons from 2 independent wells), MeCP2-WT+KCl (n=12 neurons from 2 independent wells), MeCP2-R133C (n=6 neurons from 2 independent wells), or MeCP2-R133C+KCl (n=13 neurons from 2 independent wells) INs without dendritic intersection with neighboring neurons were used for quantification. The scale bar represents 20  $\mu\text{m}$ .

(H) Depolarization-induced expressions of IEGs c-FOS, FOSB, and NPTX2 in day 74 INs. Fold numbers relative to non-KCl groups are labeled. Mean  $\pm$  SD is shown (n=3 technical repeats of the same batch of RNA pellets). KCl-induced fold changes were compared between MeCP2-WT and MeCP2-R133C groups for statistical significance. \*\*\*p < 0.001, \*p < 0.05 (unpaired t-test).

# Figure S4

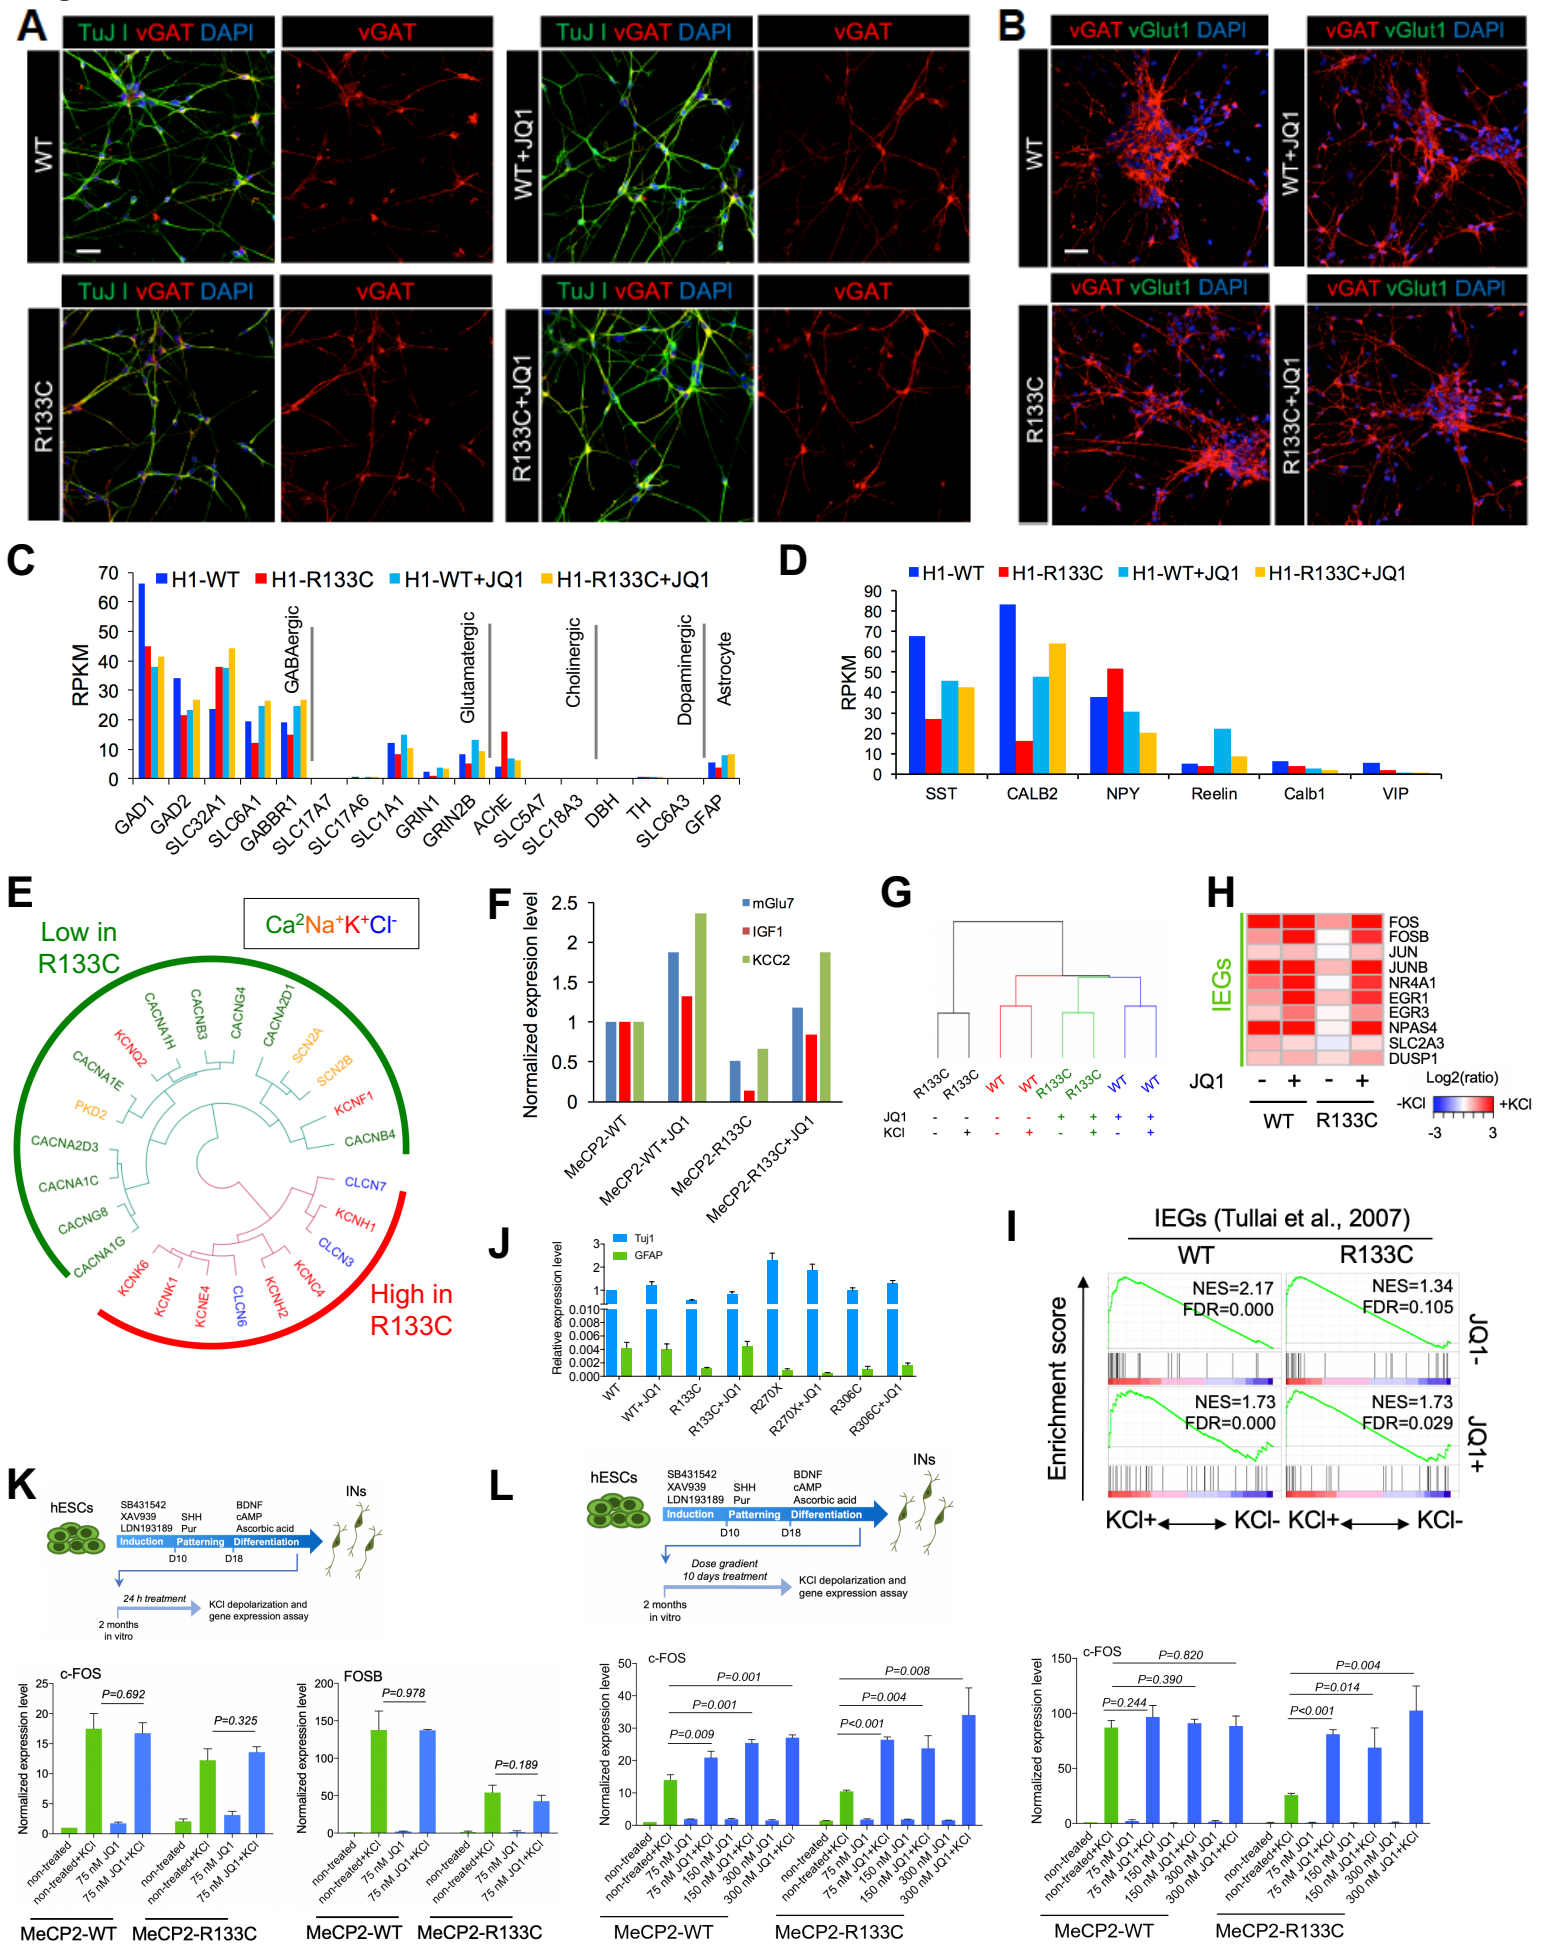

**Figure S4. Related with Figure 2. JQ1 Reverses the Abnormal Development of RTT INs**

(A and B) Immunostaining for GABAergic marker vGAT and glutamatergic marker vGlut1 in JQ1-treated and non-treated INs. INs were treated with 75 nM JQ1 beginning at day 32, and samples were re-plated at day 65, cultured and fixed for staining at day 77. The scale bar represents 25  $\mu$ m.

(C and D) Expressions of markers for various neuronal types and IN subtypes in JQ1-treated and non-treated INs. INs were treated with 75 nM JQ1 beginning at day 32, and samples were collected for RNA-seq at day 74.

(E) Dysregulation of ion channel genes in MeCP2-R133C INs (day 74).

(F) JQ1 rescued the deficient expressions of mGlu<sub>7</sub>, IGF1, and KCC2 in MeCP2-R133C INs. INs were treated with 75 nM JQ1 beginning at day 32, and samples were collected for RNA-seq at day 74. RPKMs of mGlu<sub>7</sub>, IGF1, and KCC2 in MeCP2-WT+JQ1, MeCP2-R133C, and MeCP2-R133C+JQ1 groups were normalized to those of MeCP2-WT INs.

(G) Hierarchical clustering of IN transcriptomes with or without JQ1 treatment. INs were treated with 75 nM JQ1 beginning at day 32, and samples were collected for RNA-seq at day 74.

(H) JQ1 rescues deficient IEG inductions in MeCP2-R133C INs under KCl depolarization. INs were treated with 75 nM JQ1 beginning at day 32, and samples were depolarized with 55 mM KCl for 1 hour, and collected for RNA-seq at day 74.

(I) GSEA analysis of depolarization-dependent IEG inductions in MeCP2-WT and MeCP2-R133C INs (day 74). Note MeCP2-R133C INs only displayed significant activity-induced IEG induction after JQ1 (75 nM) treatment.

(J) Expressions of neuronal marker Tuj1 and astrocyte marker GFAP in different MeCP2 mutant lines with or without JQ1 treatment. Mean  $\pm$  SD is shown (n=3 technical repeats of the same batch of RNA pellets).

(K) IEG inductions in MeCP2-WT and MeCP2-R133C INs with acute JQ1 treatment. Day 65 INs were treated with 75 nM JQ1 for 24 hours then depolarized with 55 mM KCl for 1 hour. Mean  $\pm$  SD is shown (n=3).

(L) IEG inductions in MeCP2-WT and MeCP2-R133C INs treated with different dosage of JQ1. Day 61 INs were treated with 75 nM, 150 nM, or 300 nM JQ1 for 10 days then depolarized with 55 mM KCl for 1 hour. Mean  $\pm$  SD is shown (n=3).



# Figure S5

## A

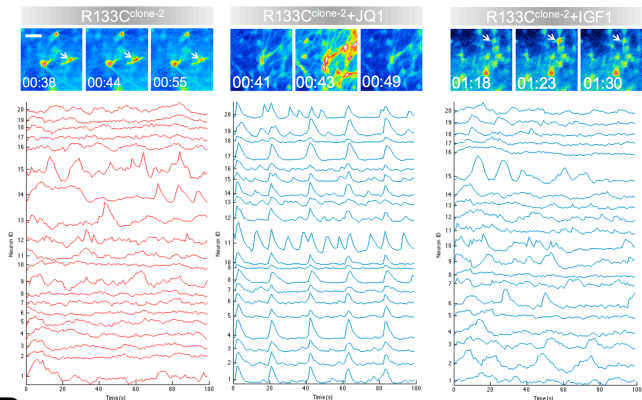

## B

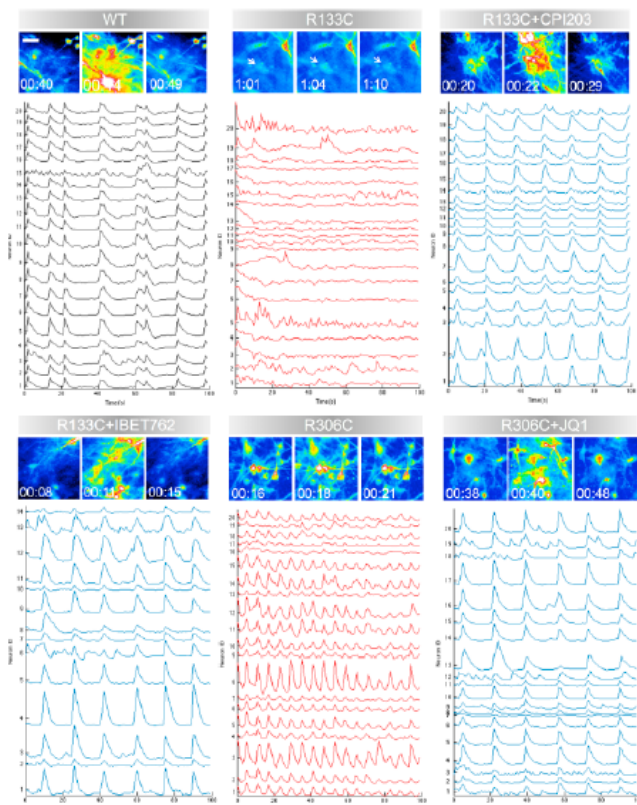

## C

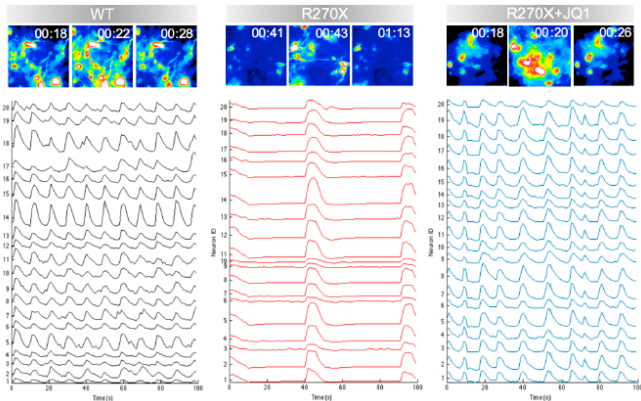

## D

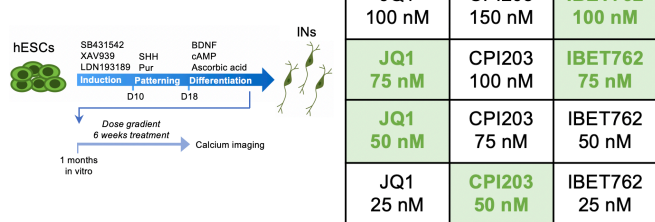

● Network synchronization observed

## E

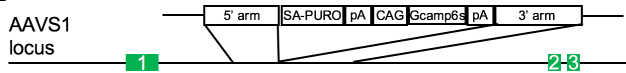

## F

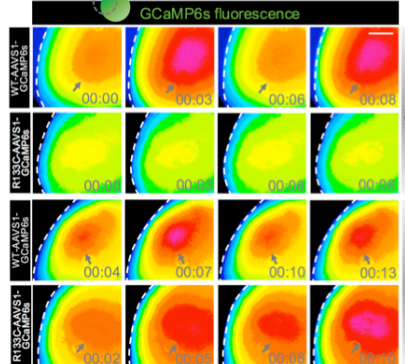

## G

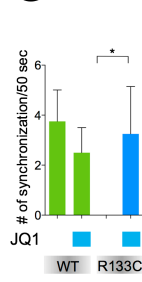

## I

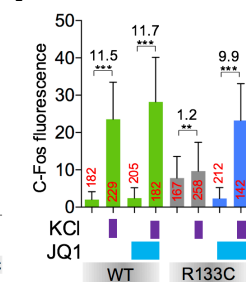

## H

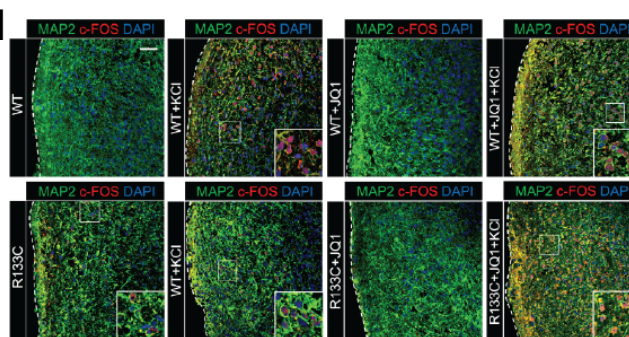

## J

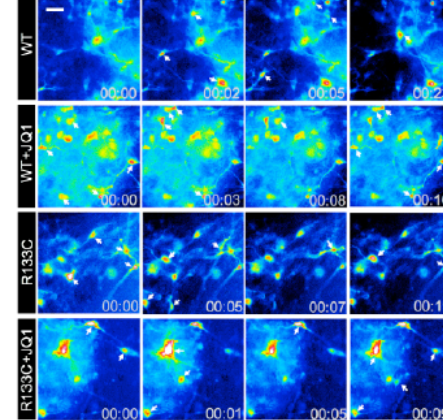

## K

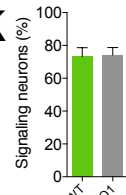

## M

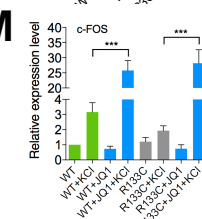

## N

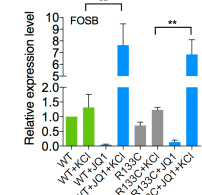

## O

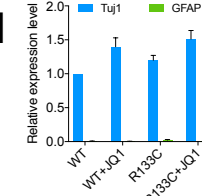

## P

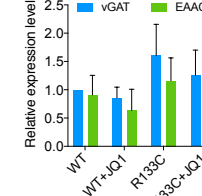

## Q

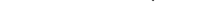

## L

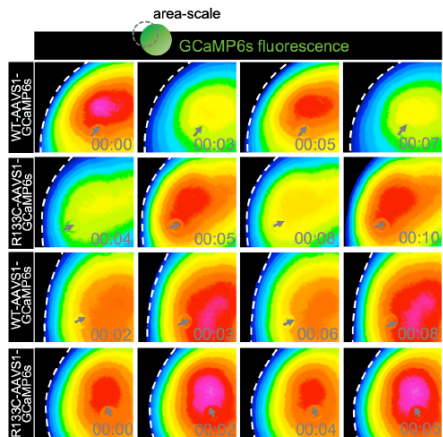

## R



## Figure S5. Related with Figure 2. JQ1 and its Analogues Rescues the Activities of RTT Neurons

(A) Representative images and quantification of calcium spikes from calcium imaging of INs from another independent MeCP2-R133C clone with JQ1 or IGF1 treatment. JQ1 treatment was initiated at day 32 (2 weeks of neuronal maturation), AAV1.syn.GCaMP6s vector transduction was performed at 5 weeks of neuronal maturation, and calcium imaging was performed at 8 weeks of neuronal maturation. The scale bar represents 20  $\mu\text{m}$ .

(B) Representative images and quantification of calcium spikes from calcium imaging of MeCP2-WT, MeCP2-R133C and MeCP2-R306C INs without treatment, or with JQ1, CPI203, or IBET762 treatment. JQ1 (75 nM), CPI203 (50 nM), or IBET762 (100 nM) treatment was initiated at day 32 (2 weeks of neuronal maturation), AAV1.syn.GCaMP6s vector transduction was performed at 5 weeks of neuronal maturation, and calcium imaging was performed at 8 weeks of neuronal maturation. The scale bar represents 20  $\mu\text{m}$ .

(C) Representative images and quantification of calcium spikes from calcium imaging of MeCP2-WT, MeCP2-R270X INs, and MeCP2-R270X INs with JQ1 treatment. JQ1 treatment was initiated at day 32 (2 weeks of neuronal maturation), AAV1.syn.GCaMP6s vector transduction was performed at 5 weeks of neuronal maturation, and calcium imaging was performed at 8 weeks of neuronal maturation. The scale bar represents 20  $\mu\text{m}$ .

(D) Summary of calcium imaging in MeCP2-R133C INs treated with different dosage of BET inhibitors. The strategy of treatment and calcium imaging was the same as depicted in Figure 2D. Network synchronizations of calcium surges were only observed in conditions labeled with green color.

(E) Construct design for knocking-in GCaMP6s into the AAVS1 site.

(F and G) Representative images (F) and quantifications (G) of area-scale calcium imaging in hMGEOs. AAVS1-CAG-GCaMP6s-expressing stable H1-MeCP2-WT or H1-MeCP2-R133C lines were used for the experiments. JQ1 (75 nM) treatment was initiated at day 25 and calcium imaging was performed at day 65. Mean  $\pm$  SD is shown (n=4 independently treated hMGEOs for each condition). \*p < 0.05 (unpaired t-test). The scale bar represents 200  $\mu\text{m}$ .

(H and I) Immunostaining for c-FOS and MAP2 (H) and quantifications (I) of corrected total nuclei fluorescence for c-FOS in hMGEOs, with or without KCl depolarization. JQ1 (75 nM) treatment was initiated at day 25, and at day 70 hMGEOs were depolarized with 55 mM KCl for 1 hour and processed for immunostaining and quantification. Fold changes are labeled in black. Mean  $\pm$  SD is shown (n=3 independently treated hMGEOs for each condition). Cell numbers for each group are labeled in red. \*\*\*p < 0.001, \*\*p < 0.01 (unpaired t-test). The scale bar represents 50  $\mu\text{m}$ .

(J and K) Representative images from calcium imaging of MeCP2-WT and MeCP2-R133C cortical neurons with or without JQ1 treatment (J) and corresponding quantifications (K). Cortical neurons were treated with JQ1 (75 nM) beginning at day 32 (2 weeks of neuronal maturation), AAV1.syn.GCaMP6s vector transduction was performed at 5 weeks of neuronal maturation, and calcium imaging was performed at 8 weeks of neuronal maturation. Quantifications of signaling neurons are shown on the right. Mean  $\pm$  SD is shown (n=4 independently treated wells). The scale bar represents 25  $\mu\text{m}$ .

(L) Representative images of area-scale calcium imaging of MeCP2-WT and MeCP2-R133C hCOs with or without JQ1 treatment. AAVS1-CAG-GCaMP6s-expressing stable H1-MeCP2-WT or H1-MeCP2-R133C lines were used for the experiments. JQ1 (75 nM) treatment was initiated beginning at day 25 and calcium imaging was performed at day 65. The scale bar represents 200  $\mu\text{m}$ .

(M) Inductions of c-FOS and FOSB in MeCP2-WT and MeCP2-R133C cortical neurons by KCl depolarization, with or without JQ1 treatment, detected by qPCR. Cortical neurons were treated with JQ1 (75 nM) beginning at day 32 (2 weeks of neuronal maturation), and at day 75 samples were depolarized with 55 mM KCl for 1 hour and processed for qPCR. Mean  $\pm$  SD is shown (n=3 technical repeats of the same batch of RNA pellets). \*\*\*p < 0.001, \*\*p < 0.01 (unpaired t-test).

(N) Expressions of neuronal marker Tuj1, astrocyte marker GFAP, GABAergic marker vGAT, and glutamatergic marker EAAC in MeCP2-WT and MeCP2-R133C cortical neurons with or without JQ1 treatment, detected by qPCR. Cortical neurons were treated with JQ1 (75 nM) beginning at day 32 (2 weeks of neuronal maturation), and at day 75 samples were depolarized with 55 mM KCl for 1 hour and processed for qPCR. Mean  $\pm$  SD is shown (n=3 technical repeats of the same batch of RNA pellets).

Figure S6

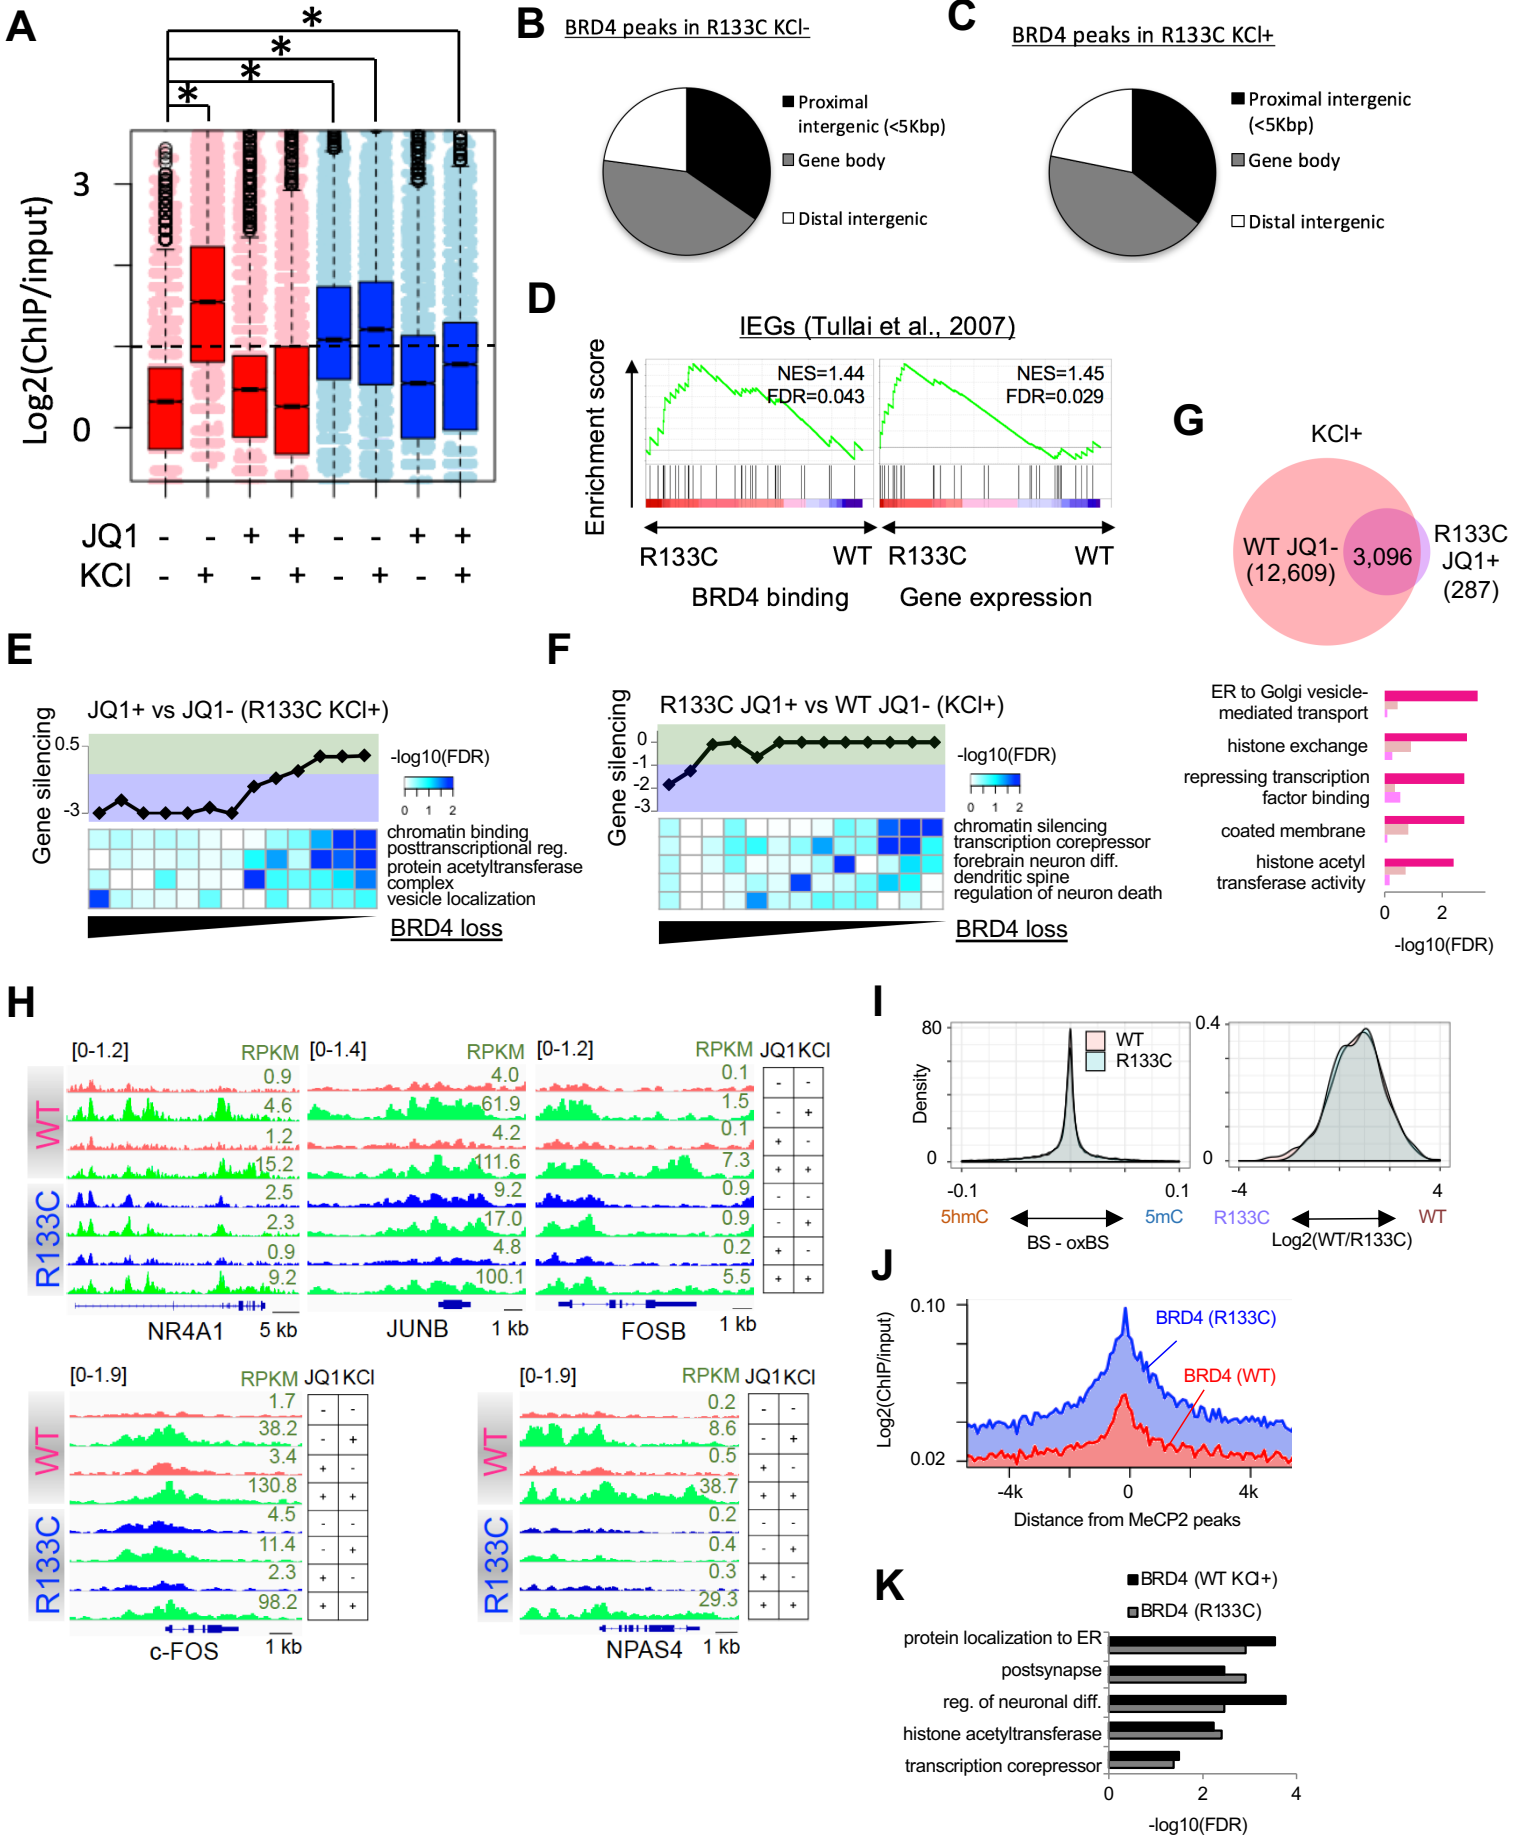

**Figure S6. Related with Figure 3 and Figure 4. BRD4 Mediates the Abnormal Transcriptions in MeCP2-R133C INs**

(A) Comparative analysis of BRD4 binding intensity under JQ1 and KCl treatment. \* represents  $p < 0.05$  by two-side T test.

(B and C) Distributions of BRD4 binding site in MeCP2-R133C INs before or after KCl depolarization.

(D) GSEA for putative IEGs between MeCP2-WT and MeCP2-R133C INs. Genes are sorted by BRD4 binding intensity (left) or expression difference (right).

(E) Silencing of gene transcription by loss of chromatin BRD4 compared between JQ1-treated, KCl-depolarized MeCP2-R133C INs and non-treated, KCl-depolarized MeCP2-R133C INs. BRD4 peaks are sorted by  $\log_2(\text{JQ1+}/\text{JQ1-})$  in MeCP2-R133C INs with KCl depolarization.

(F) Silencing of gene transcription by loss of chromatin BRD4 compared between JQ1-treated, KCl-depolarized MeCP2-R133C INs and non-treated, KCl-depolarized MeCP2-WT INs. BRD4 peaks are sorted by  $\log_2((\text{MeCP2-R133C JQ1+})/(\text{MeCP2-WT}))$  with KCl depolarization.

(G) Comparison of BRD4 chromatin binding sites between non-treated, KCl-depolarized MeCP2-WT INs and JQ1-treated, KCl-depolarized MeCP2-R133C INs (upper panel). GOs of genes that showed an activity-dependent BRD4 recruitment in non-treated, KCl-depolarized MeCP2-WT INs and JQ1-treated, KCl-depolarized MeCP2-R133C INs are shown in the bottom panel. Bar colors in the bottom panel correspond to Venn diagram colors in upper panel.

(H) BRD4 binding tracks in IEGs and the corresponding transcription levels in MeCP2-WT and MeCP2-R133C INs with or without JQ1 treatment, depolarized or non-depolarized with KCl. Note that gene showed either increased (NR4A1, JUNB, FOSB, and c-FOS) or normal (NPAS4) BRD4 recruitment in MeCP2-R133C INs at basal level, but only gained depolarization-induced BRD4 recruitment after JQ1 treatment. Corresponding RPKM from RNA-seq data is labeled in green.

(I) Difference of 5hmC level on CpGIs (left) and MeCP2 binding to 5hmC-enriched CpGIs (right) between MeCP2 WT and MeCP2-R133C.

(J) Co-localization of WT MeCP2 peaks with BRD4 peaks in MeCP2-R133C INs and depolarized MeCP2-WT INs.

(K) Significant GO terms for common target genes shown in Figure 4C.



**Figure S7. Related with Figure 6. Effects of JQ1 on Regionally Specified Human Brain Organoids**

- (A) Immunostaining for MAP2 and vGAT in hMGEOs. The scale bar represents 50  $\mu$ m.
  - (B) Immunostaining for TUJ1 and SOX2 in hCOs. The scale bar represents 50  $\mu$ m.
  - (C and D) Immunostaining for TUJ1 and FAM107A (C), MAP2 and S100 (D) in hCOs. The scale bar represents 50  $\mu$ m in C, and 12.5  $\mu$ m in D.
  - (E) tSNE plot of single cells distinguished by clusters.
  - (F) Evaluation of double frequency. Log<sub>2</sub>(normalized UMI) of GFAP and TBR1 are plotted at X and Y axis, respectively.
  - (G) Schematic representation of cluster annotation.
  - (H) UMI counts, percentage of mitochondria DNAs, expression of cell type-specific genes across and enrichment of Gene Ontology across 30 clusters. Bar graphs represent Mean  $\pm$  SD. Heatmaps represent  $-\log_{10}$ (FDR) of GO terms.
  - (I) Expression patterns of genes related with early neurogenesis and neuronal growth cone.
  - (J) Enrichment of gene signatures for neuron NPC, astrocyte and oligodendrocyte. Enrichment and depletion are scaled by  $-\log_{10}$ (FDR) and shown by red and blue colors, respectively.
  - (K) ClueGO network for genes rescued by JQ1 in hMGEOs (top) and hCOs (bottom).
- See also Figure 6.
